# Supplementary material
Source: Springer Nature journal article supplement (https://www.springermedizin.de/resource/supplementary/12939_2012_351_MOESM1_ESM.pdf/9551130)
Supplement: MOESM1 [file 9551130]

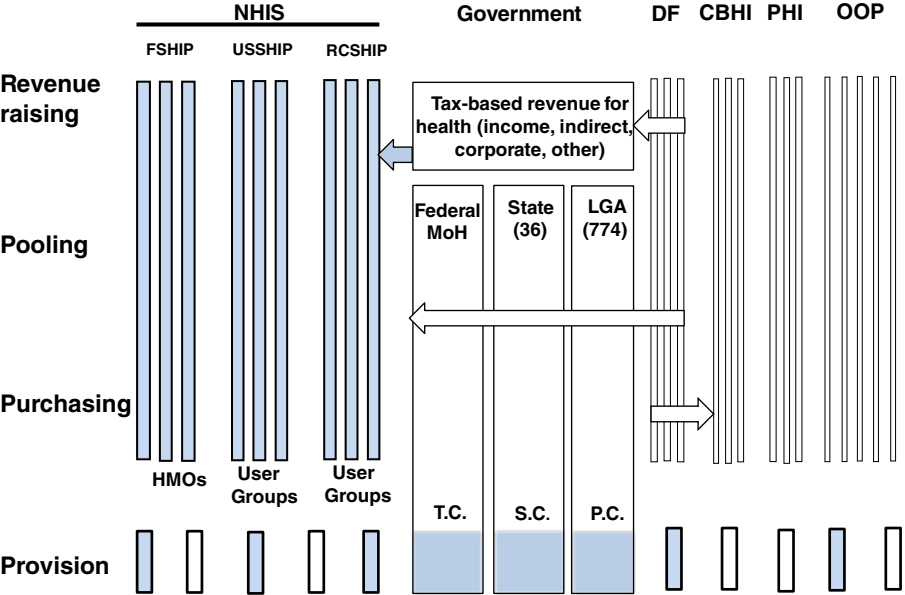

NHIS-accredited and non-accredited providers: public and private; primary, secondary and tertiary; pharmacies, opticians, dentists; traditional healers. Access to providers can be via any payer category
